# Supplementary material for: Alanyl-tRNA Synthetase Quality Control Prevents Global Dysregulation of the Escherichia coli Proteome
Source: PubMed Central journal article supplement (PMC6918089; doi:10.1128/mbio.02921-19), 2019-12-17
Supplement: mBio.02921-19-sf001.pdf [file mBio.02921-19-sf001.pdf]

Supplemental Figure 1.

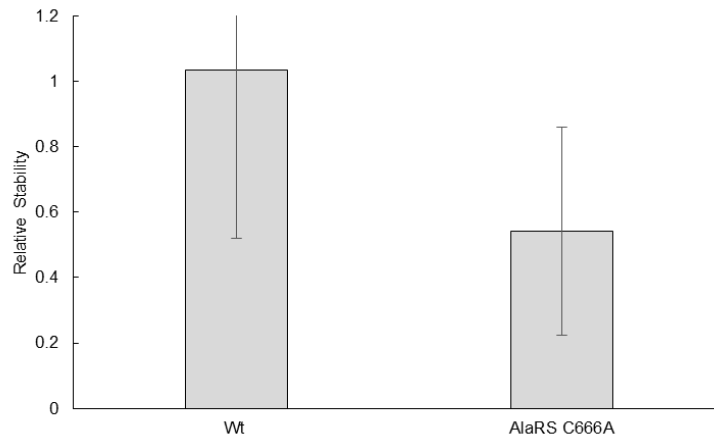

Supplemental Figure 1. *The AlaRS C666A protein does not have elevated active site stability in vitro. In vitro* active site stability assays of both wild-type and AlaRS C666A recombinant proteins indicated no inherent difference in protein stability.
