# Supplementary material for: Alanyl-tRNA Synthetase Quality Control Prevents Global Dysregulation of the Escherichia coli Proteome
Source: PubMed Central journal article supplement (PMC6918089; doi:10.1128/mbio.02921-19), 2019-12-17
Supplement: mBio.02921-19-sf002.pdf [file mBio.02921-19-sf002.pdf]

Supplemental Figure 2.

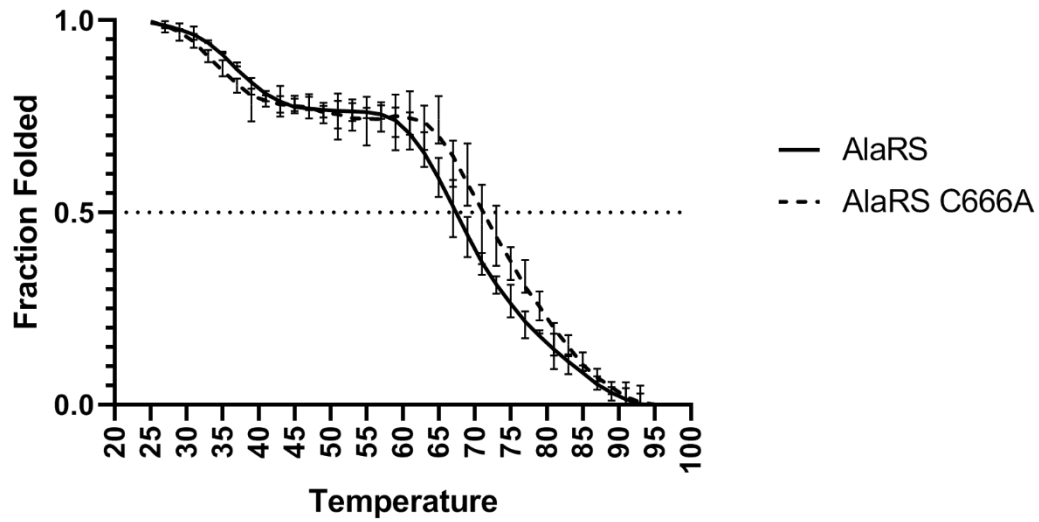

Supplemental Figure 2. *The AlaRS C666A protein does not have elevated thermal stability.* Melting curves of recombinant wild-type AlaRS and AlaRS C666A proteins indicated no inherent difference in thermal stability.
